# Supplementary material
Source: publisher site journal article supplement (http://www.kjim.org/upload/media/kjim-2020-064-suppl6.pdf)
Supplement: Supplementary file 1 [file kjim-2020-064-suppl6.pdf]

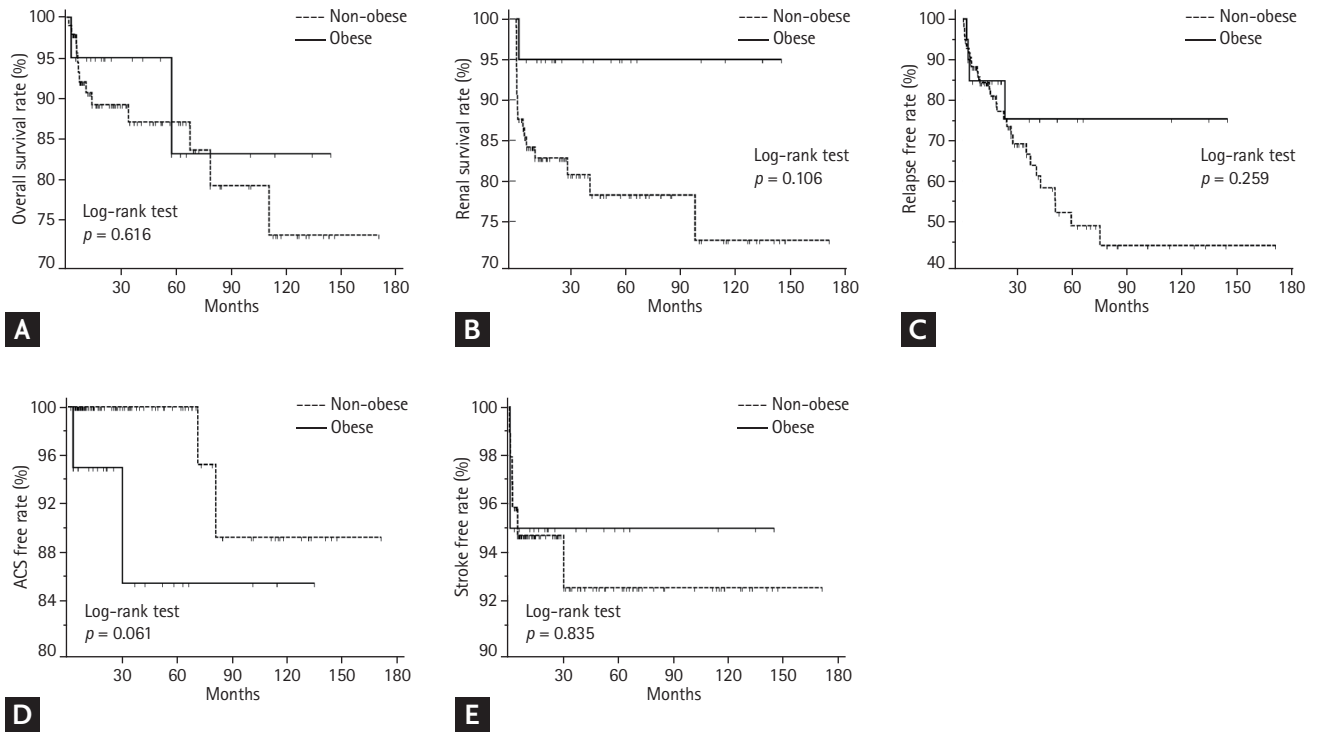

**Supplementary Figure 2.** Comparison of clinical outcome measures between obese and non-obese patients with anti-neutrophil cytoplasmic antibody-associated vasculitis (AAV). The overall survival rate (A), renal survival rate (B), relapse-free survival rate (C), acute coronary syndrome (ACS)-free rate (D), and stroke-free rate (E) are compared between obese and non-obese patients with AAV.
